# Supplementary material
Source: PubMed Central journal article supplement (PMC7156161)
Supplement: mmc1.pdf [file mmc1.pdf]

**Current Biology, Volume 30**

**Supplemental Information**

**Probable Pangolin Origin of SARS-CoV-2  
Associated with the COVID-19 Outbreak**

**Tao Zhang, Qunfu Wu, and Zhigang Zhang**

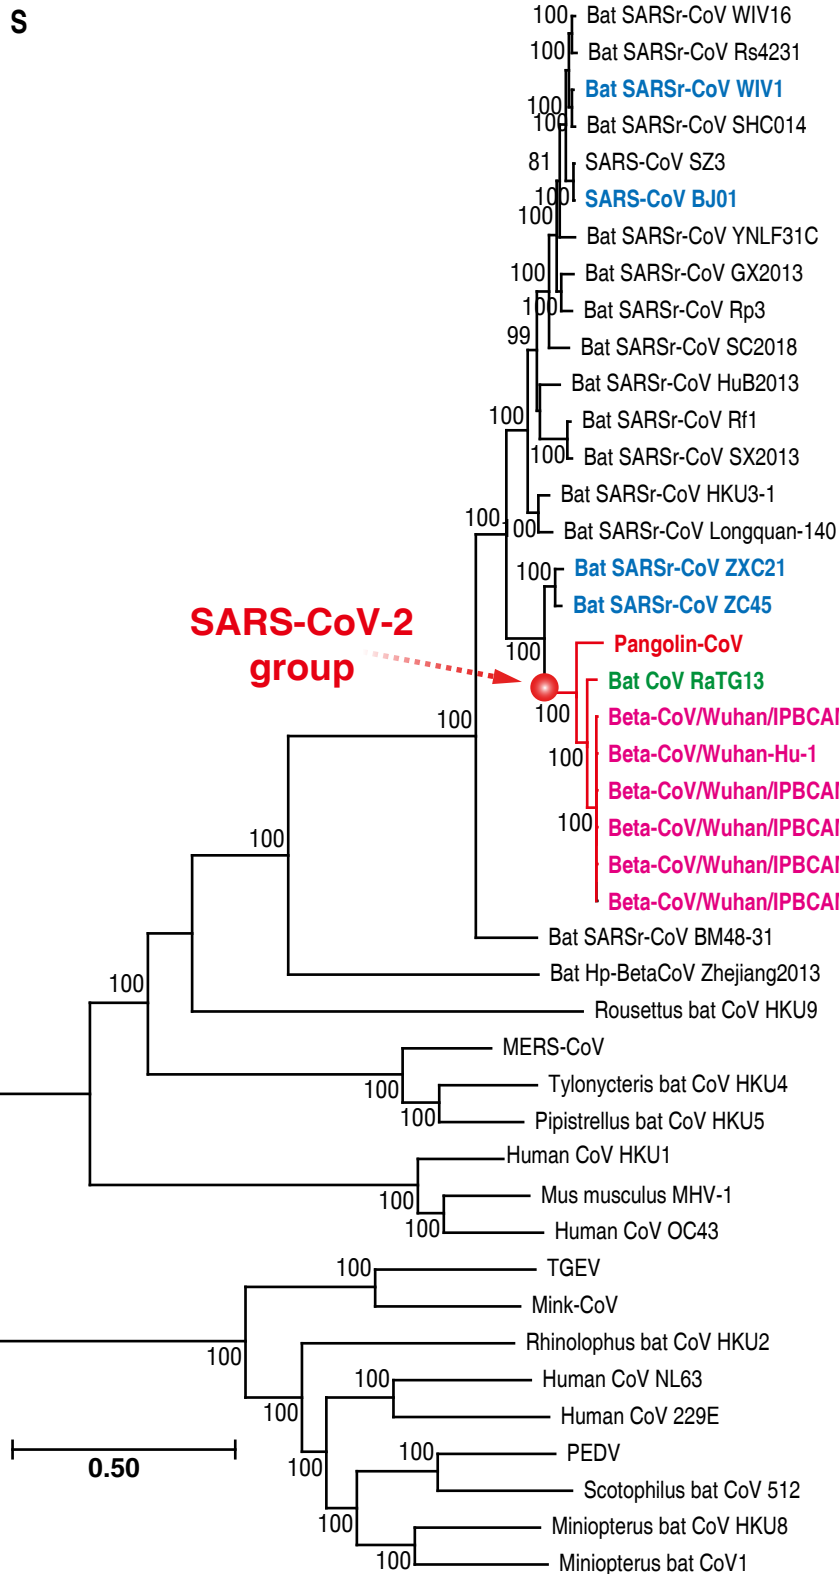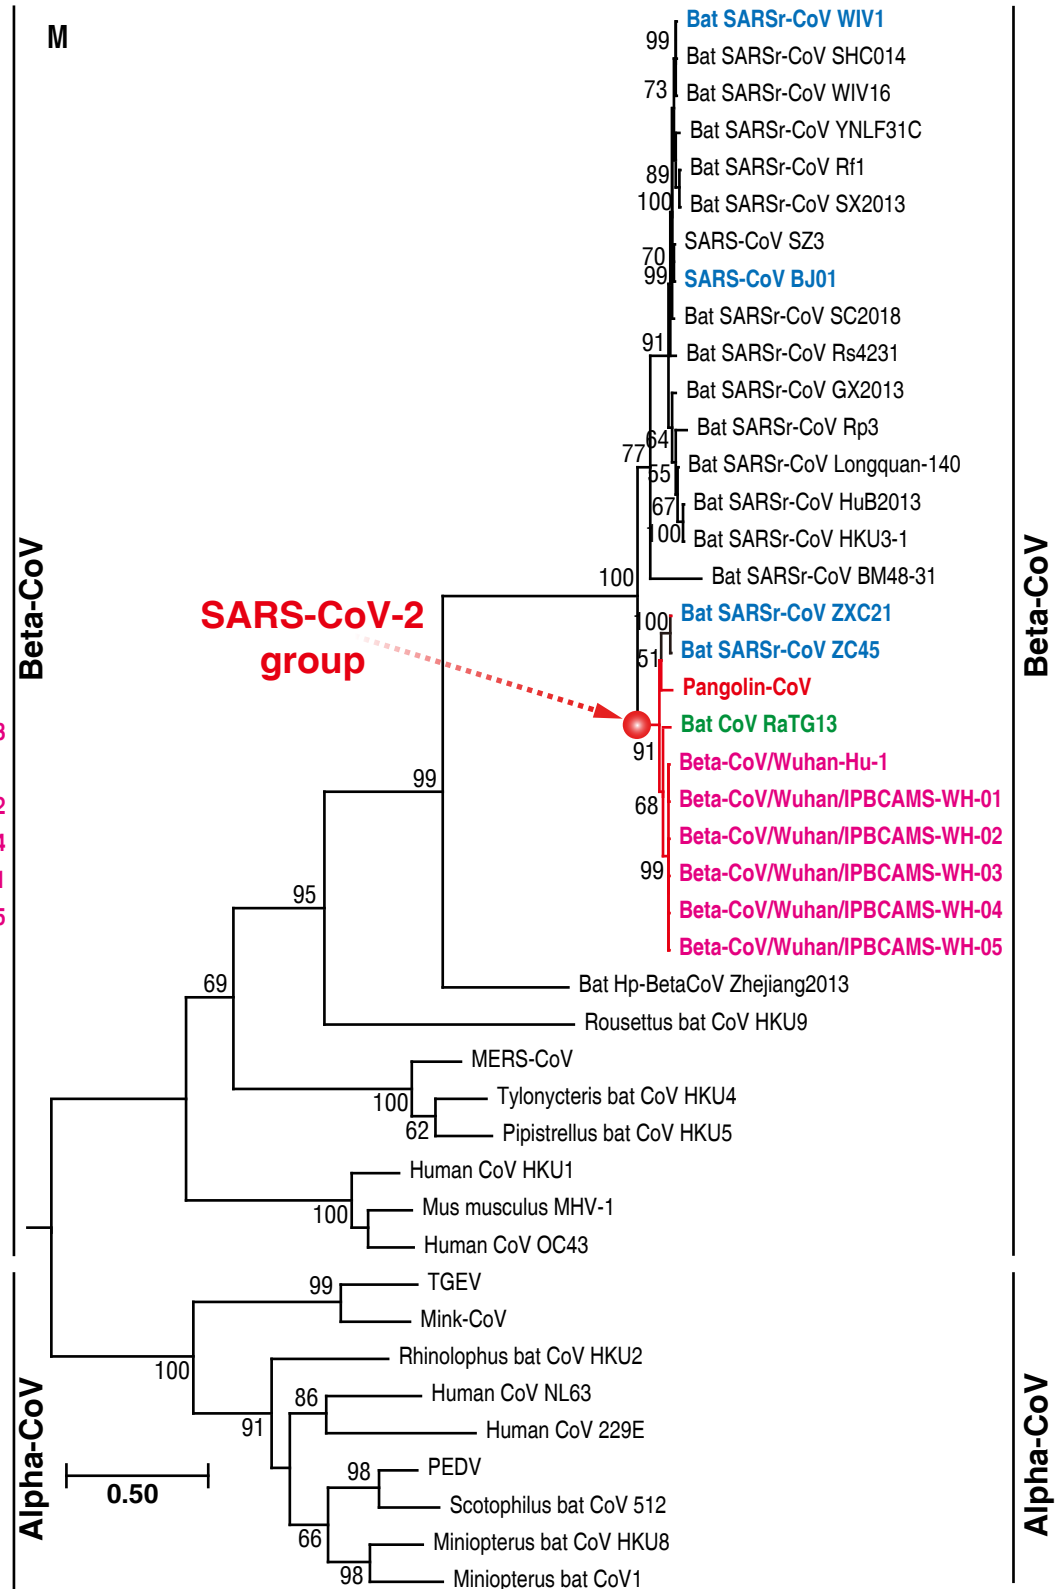

**Figure S1. Phylogenetic relationship of CoVs based on the S gene and M gene nucleotide sequences. Related to Figure 2.**

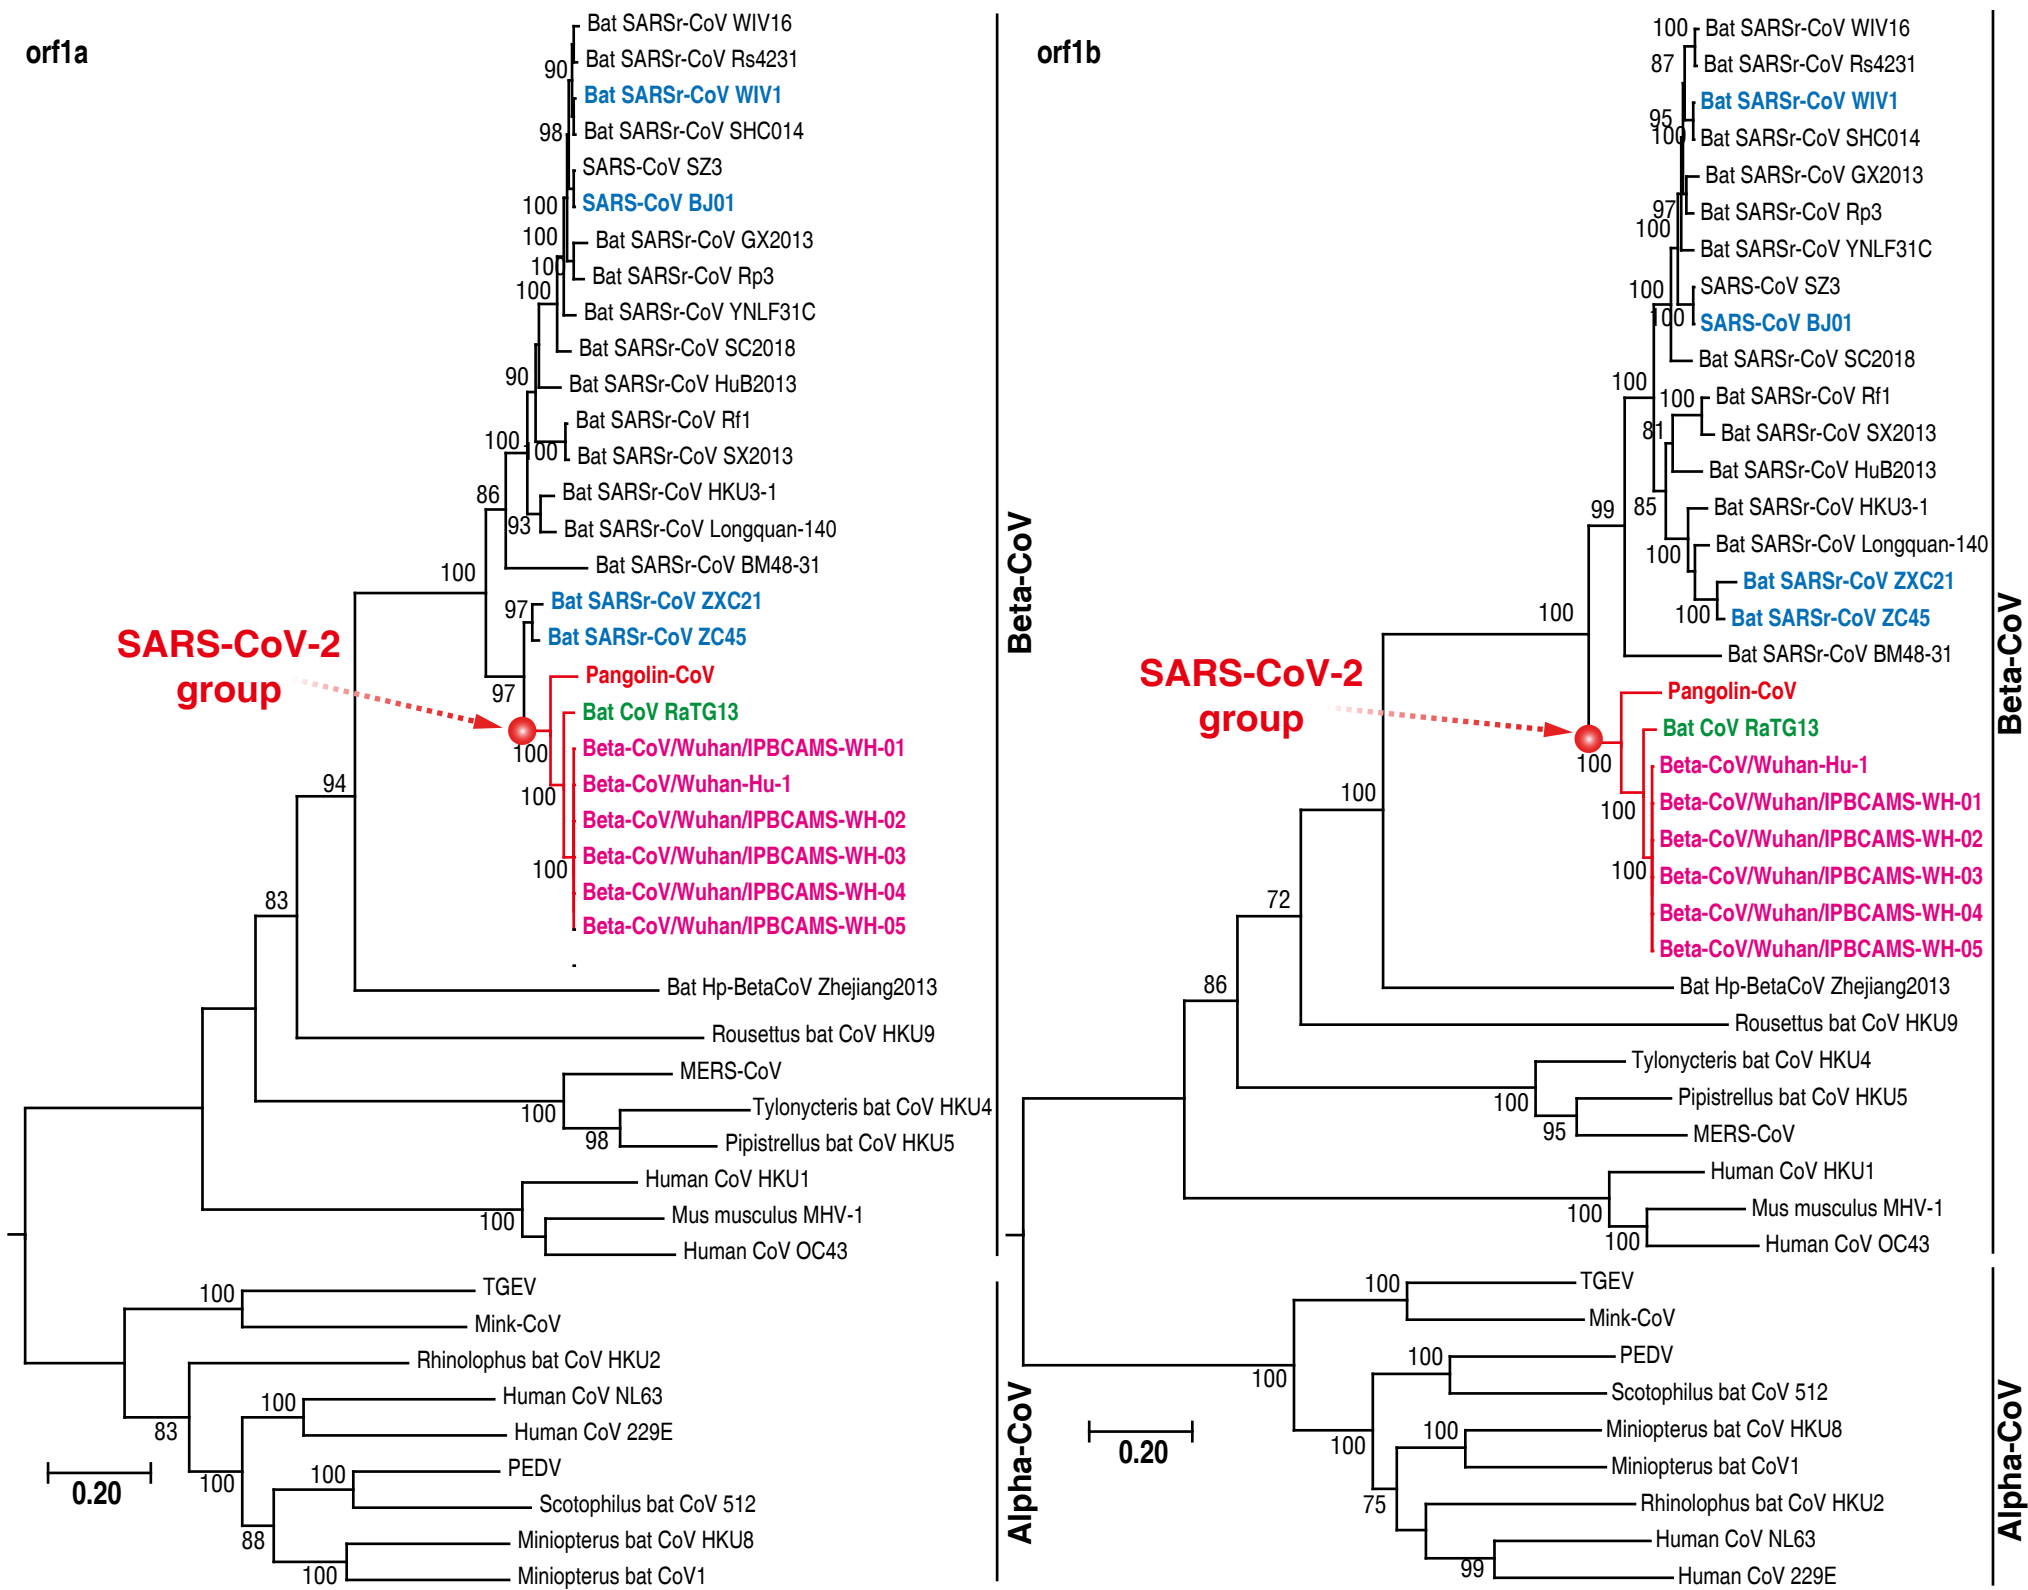

**Figure S2. Phylogenetic relationship of CoVs based on the ORF1a gene and ORF1b gene nucleotide sequences. Related to Figure 2.**

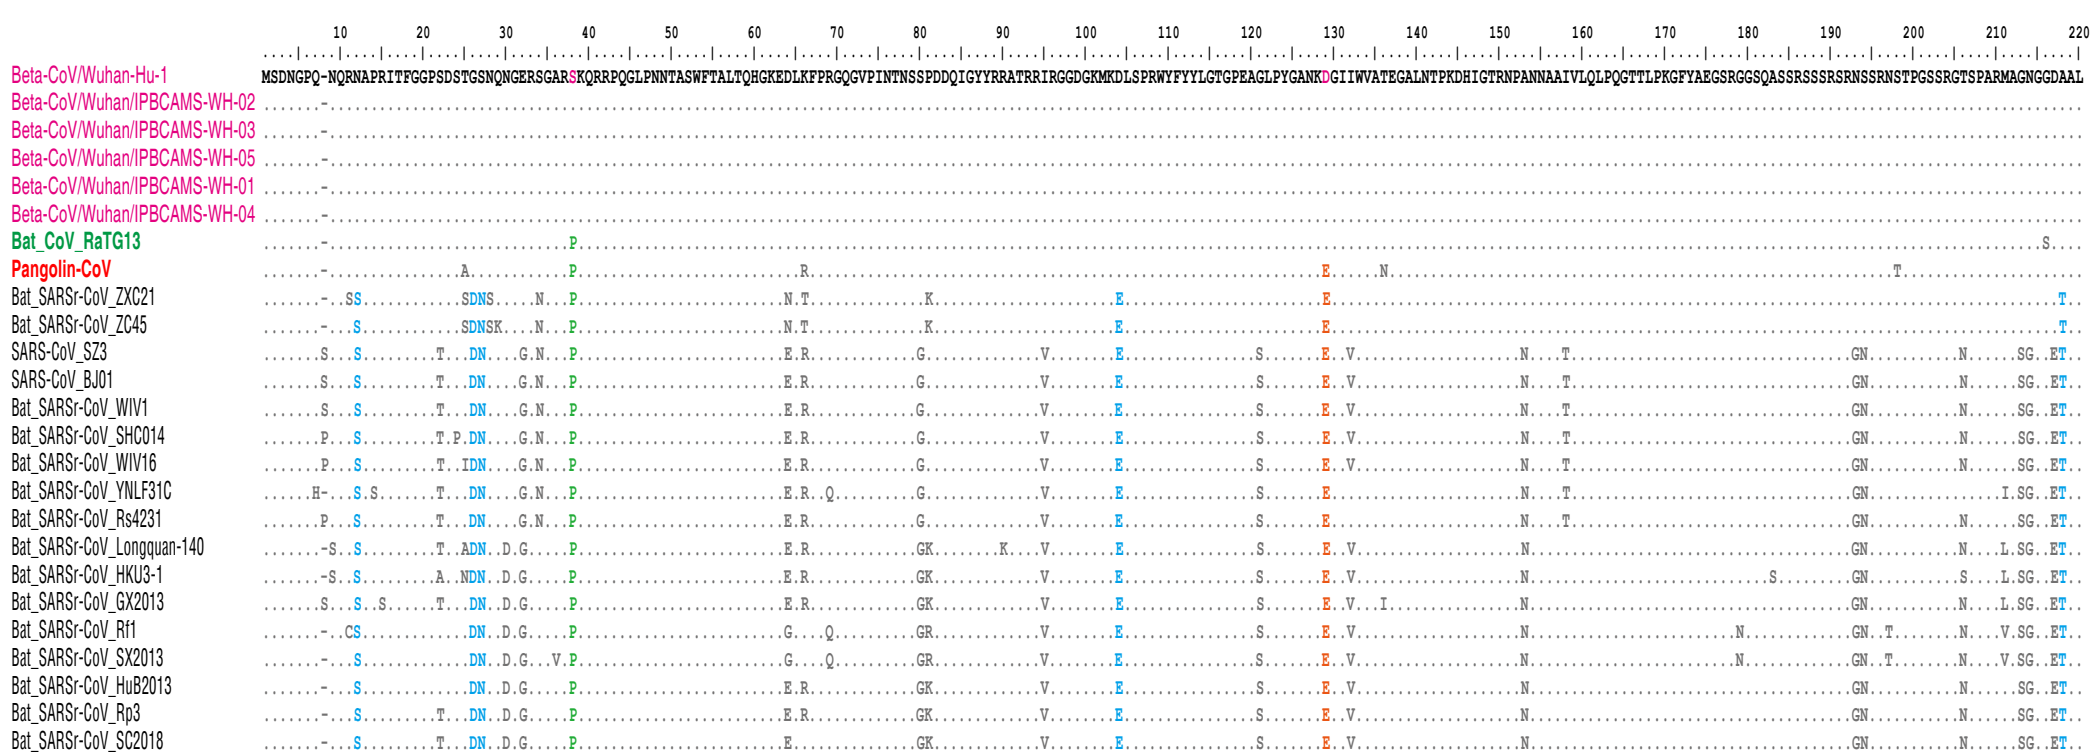

**Figure S3. Amino acid sequence alignment of the N protein and its phylogeny.** Highly-conserved amino acid residues in the N-protein marked by colours have diagnostic potential. **Related to Figure 2.**
